# Supplementary material for: PDGFRβ is an essential therapeutic target for BRCA1-deficient mammary tumors
Source: Springer Nature journal article supplement (doi:10.1186/s13058-021-01387-x), 2021-01-21
Supplement: MOESM1 [file 18787780]

## Additional File 1

### Primer sequence for accessing the occupancy of BRCA1 on the PDGFR $\beta$ locus

|          |          |                                                 |                                                 |
|----------|----------|-------------------------------------------------|-------------------------------------------------|
| Primer 1 | FW<br>RV | TCTCTAGCTCTCCAACCTCCT<br>GACTGTCACTCCTCCTCTCAAC | 122bp-site -2652 (-2677~-2657)<br>(-2534~-2555) |
| Primer 2 | FW<br>RV | AATTGAAAACAGACGCACGC<br>GCTCACACCACTATGGGCTT    | 144bp-site -65 (-129~-110)<br>(-6~13)           |
| Primer 3 | FW<br>RV | GATGGGGACGCAGAGTTCAG<br>GGGATCTCGGACTGGCTTTAC   | 109bp-site 16561 (16484~16503)<br>(16578~16598) |
| Primer 4 | FW<br>RV | CTGCGGGAGTTCTCTGGGTT<br>CCGGGTGACAGTTCCAATACC   | 114bp-site 18382 (18301~18320)<br>(18433~18453) |
