# Supplementary material for: PDGFRβ is an essential therapeutic target for BRCA1-deficient mammary tumors
Source: Springer Nature journal article supplement (doi:10.1186/s13058-021-01387-x), 2021-01-21

A

*p16<sup>-/-</sup>; Brca1<sup>MGKO</sup>*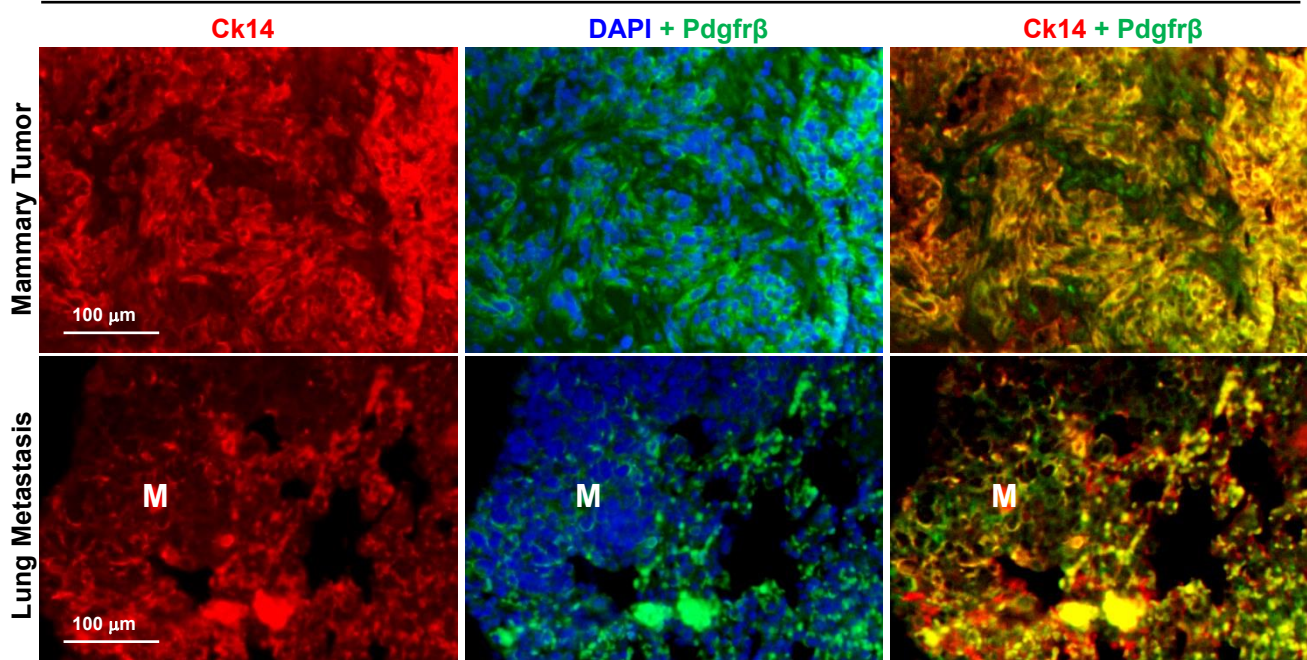

B

*p18<sup>-/-</sup>; Brca1<sup>MGKO</sup> (Tumor B)*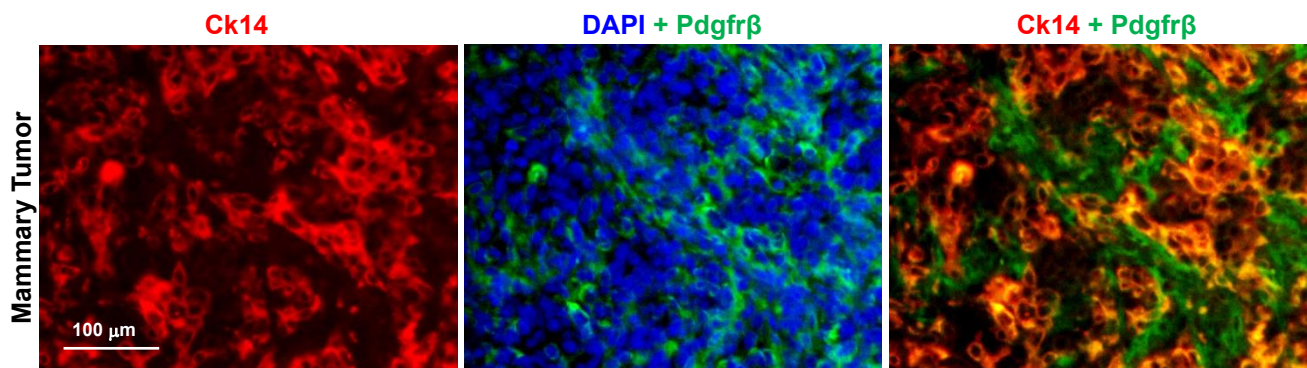

Supplement: MOESM3 [file 18787780]
