# Supplementary material for: PDGFRβ is an essential therapeutic target for BRCA1-deficient mammary tumors
Source: Springer Nature journal article supplement (doi:10.1186/s13058-021-01387-x), 2021-01-21

**A**

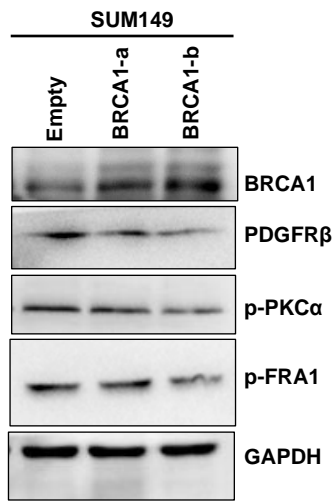

**B**

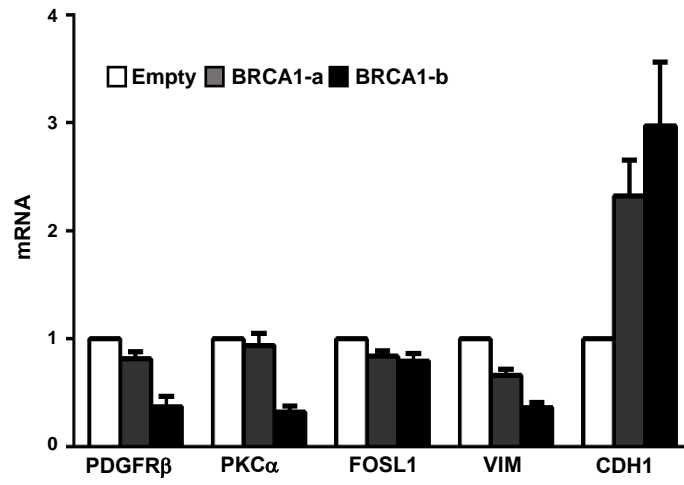

Supplement: MOESM5 [file 18787780]
