# Supplementary material for: PDGFRβ is an essential therapeutic target for BRCA1-deficient mammary tumors
Source: Springer Nature journal article supplement (doi:10.1186/s13058-021-01387-x), 2021-01-21
Supplement: MOESM7 [file 18787780]

A

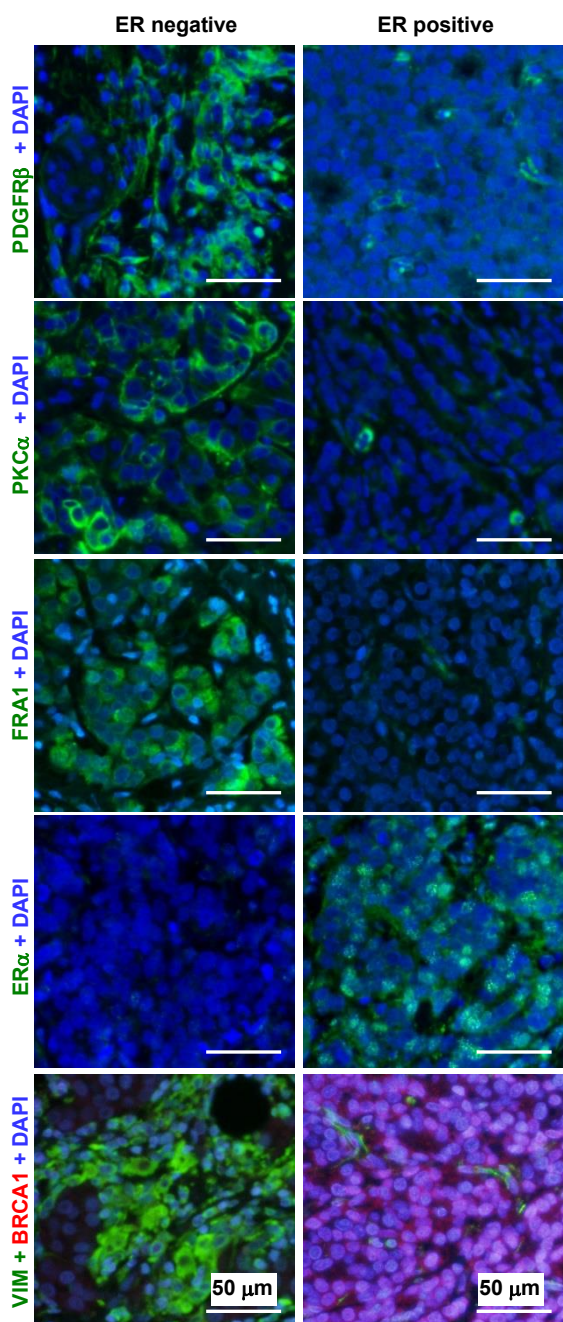

B

| #  | ER | BRCA1 | PDGFRβ | PKCα | FRA1 | VIM |
|----|----|-------|--------|------|------|-----|
| 1  | +  | ++++  | -      | -    | -    | -   |
| 2  | +  | +++   | -      | -    | -    | -   |
| 3  | +  | +++   | -      | -    | -    | -   |
| 4  | +  | ++    | -      | -    | -    | -   |
| 5  | +  | ++    | -      | +/-  | +/-  | +/- |
| 6  | +  | ++    | +/-    | +/-  | +    | +/- |
| 7  | +  | +     | +      | +/-  | +/-  | +   |
| 8  | +  | +     | -      | +/-  | +/-  | +   |
| 9  | -  | +/-   | +/-    | +    | +    | +   |
| 10 | -  | +/-   | +      | +    | +    | +/- |
| 11 | -  | -     | -      | +/-  | +/-  | +   |
| 12 | -  | -     | +/-    | +    | +/-  | +   |
| 13 | -  | -     | +      | +    | +    | +   |
| 14 | -  | -     | +      | ++   | +    | +   |
| 15 | -  | -     | +      | ++   | ++   | ++  |
| 16 | -  | -     | ++     | ++   | +++  | ++  |
| 17 | -  | -     | ++     | ++   | +++  | +++ |
| 18 | -  | -     | ++     | +++  | +++  | ++  |
